# Supplementary material for: Characteristics of Germline Non-BRCA Mutation Status of High-Risk Breast Cancer Patients in China and Correlation with High-Risk Factors and Multigene Testing Suggestions
Source: Frontiers journal article supplement (doi:10.3389/fgene.2021.674094), 2021-11-30
Supplement: Table_2.XLSX [file Table_2.XLSX]

## Sheet: Table2
Table 2. Patients Harboring Multiple Variants
ID	Mutation variant
N1729354	BRCA1：c.2866_2870del; p.Ser956fs	RAD51D：c.270_271dup; p.Lys91fs
M2001617	BRCA1：c.5470_5477del; p.Ile1824fs	RAD51D：c.556C>T; p.Arg186*
M1921070	BRCA1：c.5503C>T; p.Arg1835*	MLH1：c.1038G>C; p.Gln346His
M2002180	BRCA2：c.8987del；p.Leu2996fs	RAD51C：c.1000G>T; p.Glu334*
M2001784	MER11：c.1897C>T; p.Arg633*	TP53：c.328dup; p.Arg110fs
